# Supplementary material for: Distinct binding properties of TIAR RRMs and linker region
Source: PubMed Central journal article supplement — RNA Biol. 2013 Apr 1;10(4):579–89. doi: 10.4161/rna.24341 (PMC3710364; doi:10.4161/rna.24341), 2013-04-01
Supplement: rna-10-579-s01.pdf [file rna-10-579-s01.pdf]

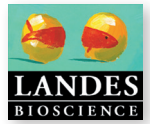

## **Supplemental Material to:**

**Henry S. Kim, Stephen J. Headey, Yano M.K. Yoga,  
Martin J. Scanlon, Myriam Gorospe,  
Matthew C.J. Wilce and Jacqueline A. Wilce**

**Distinct binding properties of TIAR RRM1s and linker region**

**2013; 10(4)**

**<http://dx.doi.org/10.4161/rna.24341>**

**[www.landesbioscience.com/journals/rnabiology/article/24341/](http://www.landesbioscience.com/journals/rnabiology/article/24341/)**

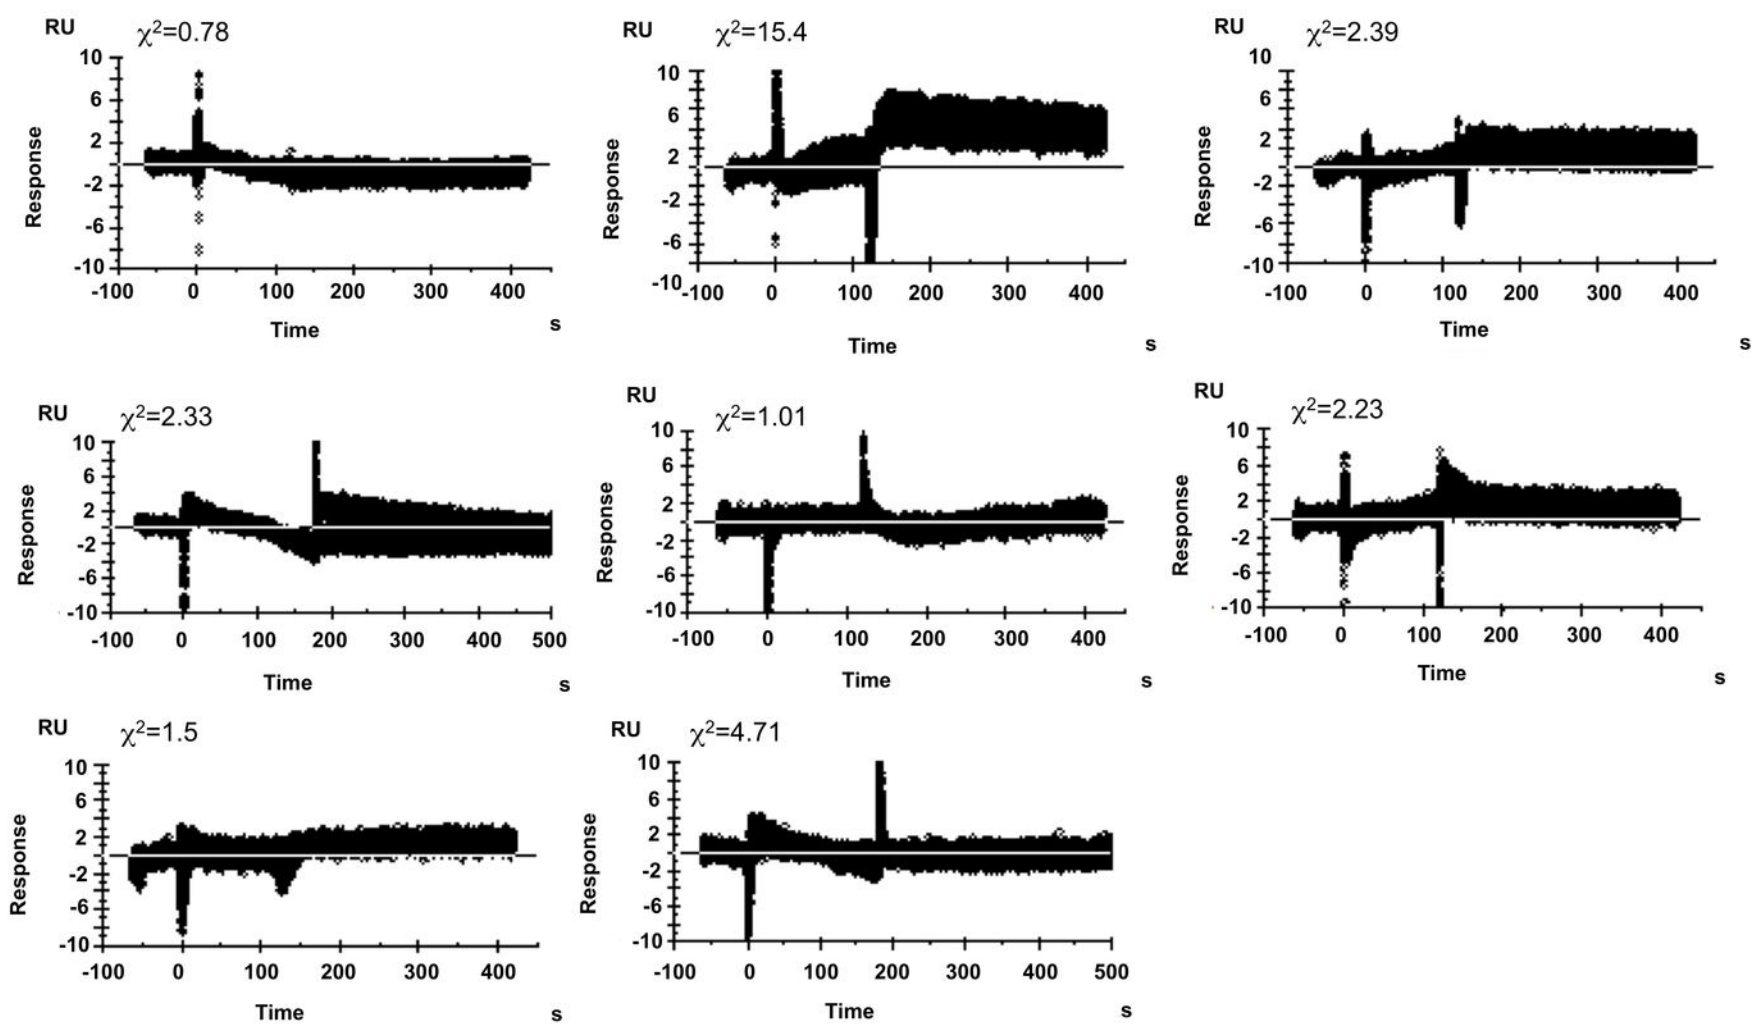

**Supplementary Figure 1.** Residual plots and corresponding  $\chi^2$  values for the fit of models to the SPR data presented in Figures 2 and 3 of the main text. The combined residuals from the fit to the series of sensorgrams are shown. Starting from the **top row (left to right)**, Figure 2 TIAR1, TIAR2<sup>S</sup>, TIAR12<sup>S</sup>; **Second row**, Figure 2 TIAR2<sup>L</sup>, Figure 3 TIAR<sup>L</sup>, TIAR2<sup>S</sup>; **Third row**, Figure 3 TIAR12<sup>S</sup>, TIAR2<sup>L</sup>.

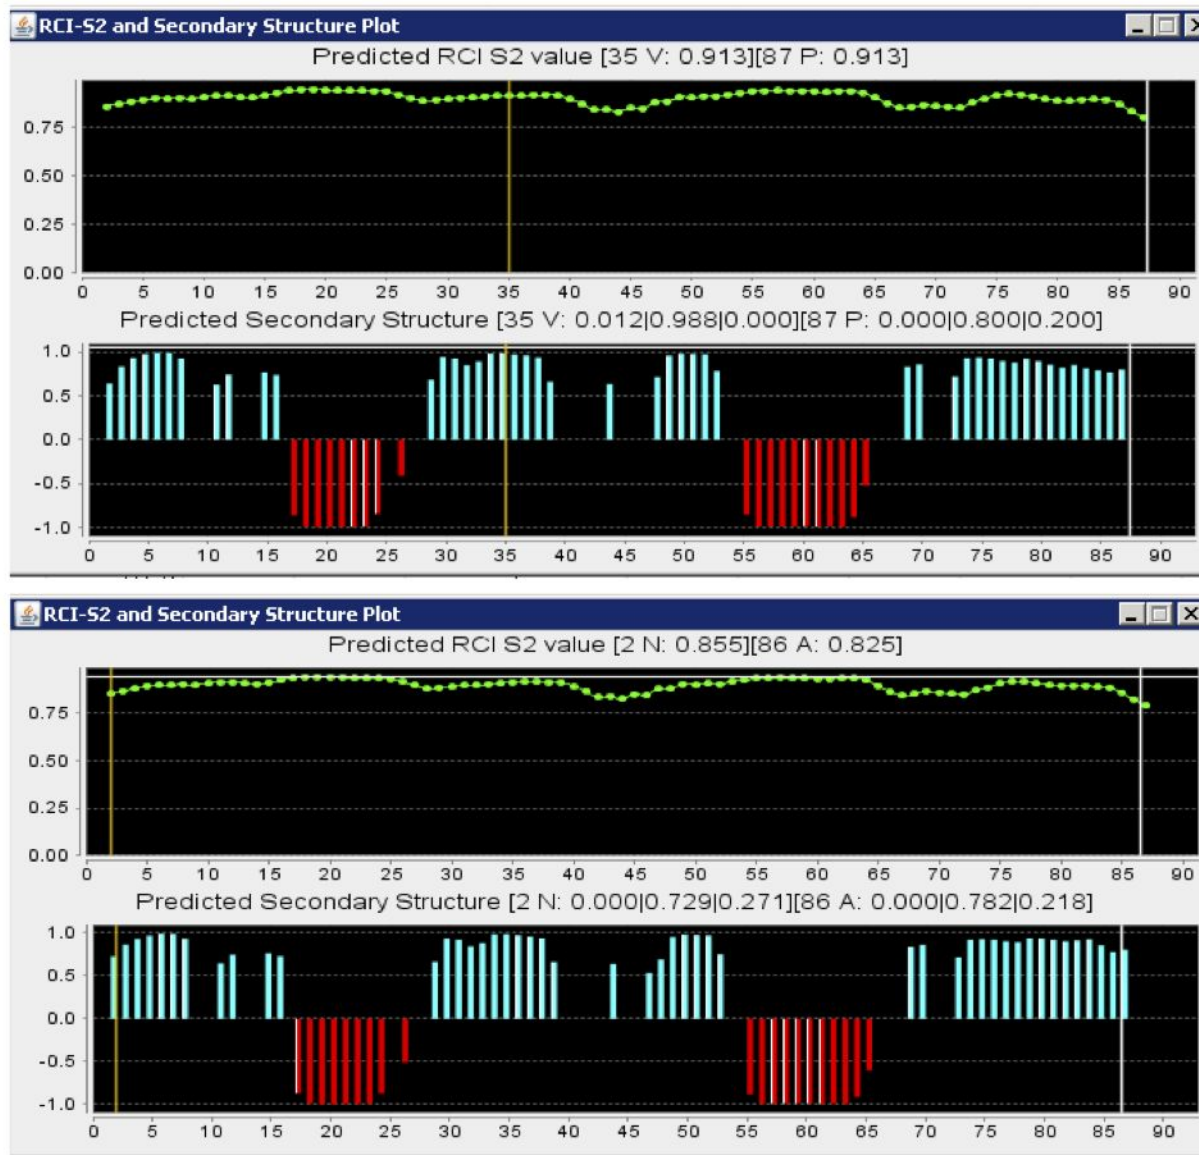

**Supplementary Figure 2.** Secondary structure predictions for ) TIAR2<sup>L</sup> from NMR chemical shifts (HN, N, CA, CB) using the program TALOS [Cornilescu et al., (1999) *J. Biomol. NMR*, 13, 289-302]. The predictions for apo (top) and RNA-bound (bottom) TIAR2<sup>L</sup> are identical.
